# Supplementary material
Source: publisher figshare collection journal article supplement (https://frontiersin.figshare.com/ndownloader/files/24171722)
Supplement: Supplementary file [file 24171722]

## SUPPLEMENTAL MATERIALS

Figure S1. Comparison of parallelism for cytokine assays demonstrates ability to quantify cytokines across three species.

Figure S2. The tissue microenvironment is dynamic, and the ability to regenerate is associated with a specific immune response to injury.

Table S1. Summary of animals used in this study.

Table S2. One-way ANOVA analyses of log-transformed uninjured serum data.

Table S3. Two-way ANOVA analyses of log-transformed serum time series data.

Table S4. Two-way ANOVA analyses of log-transformed tissue lysate time series data.

Table S5. One-way ANOVA analysis of tissue cytokine data to test for an effect of group at D1, 2, 10, 20.

Table S6. List of T cell phenotyping antibodies tried using flow cytometry in *Acomys cahirinus*.

Data File S1 contains summary tables of post-hoc multiple comparison tests used in Figure 2, Figure 3 and Figure S2.

Data File S2. Comparisons of amino acid sequence alignments for antigens in study.

## SUPPLEMENTAL FIGURES

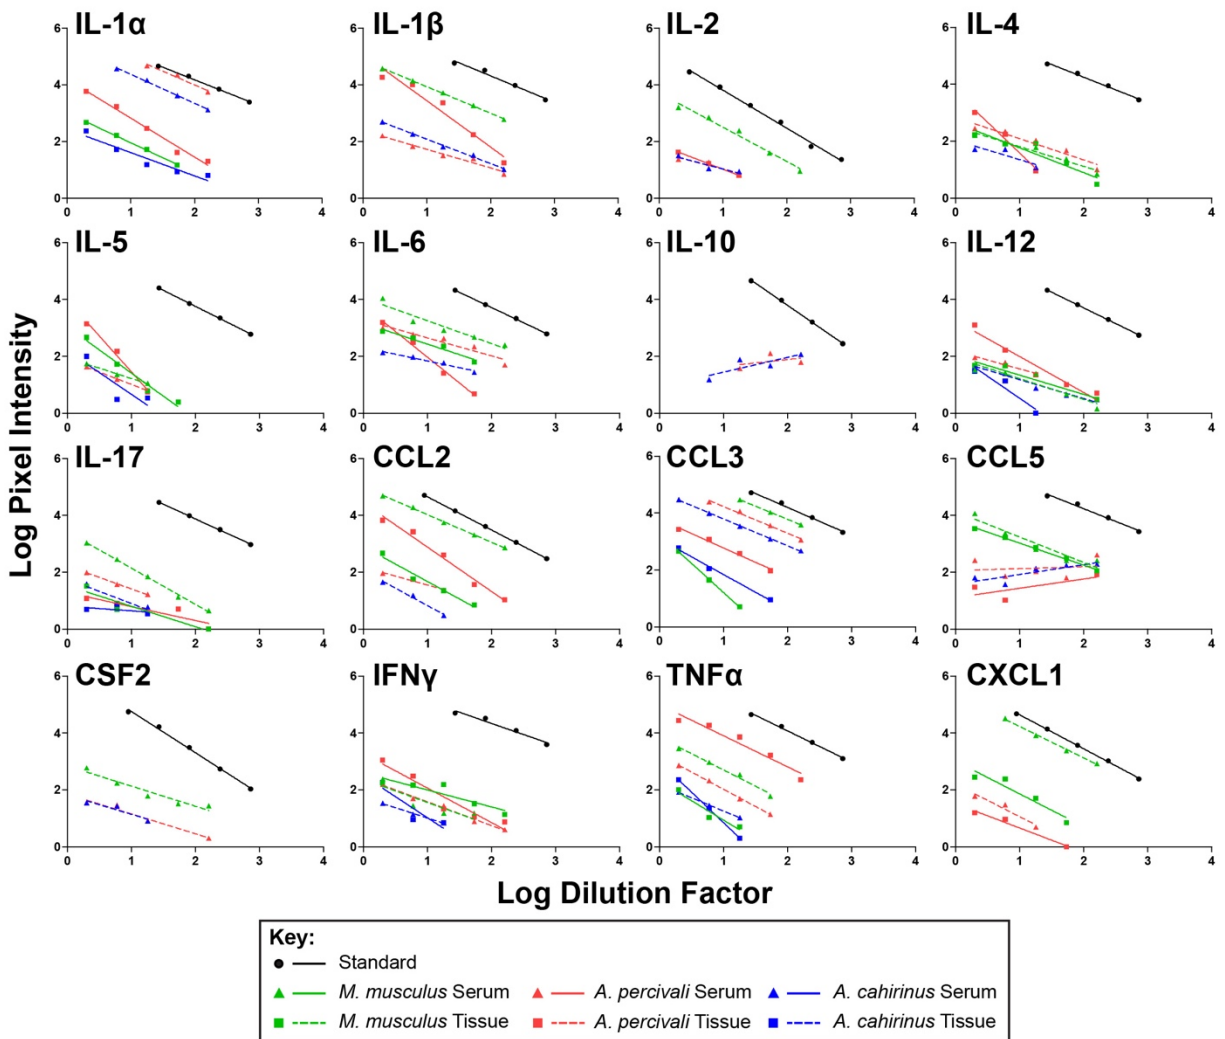

**Figure S1. Comparison of parallelism for cytokine assays demonstrates ability to quantify cytokines across three species.** Serial dilution of serum (triangles, solid lines) and tissue lysate (squares, dashed lines) shows similar negative slopes for *M. musculus* (green), *A. percivali* (red) and *A. cahirinus* (blue) compared to the standard (black, circles, solid line). Data represent the mean for duplicates and lines are linear regressions calculated from all data that was above the lower limit of detection.

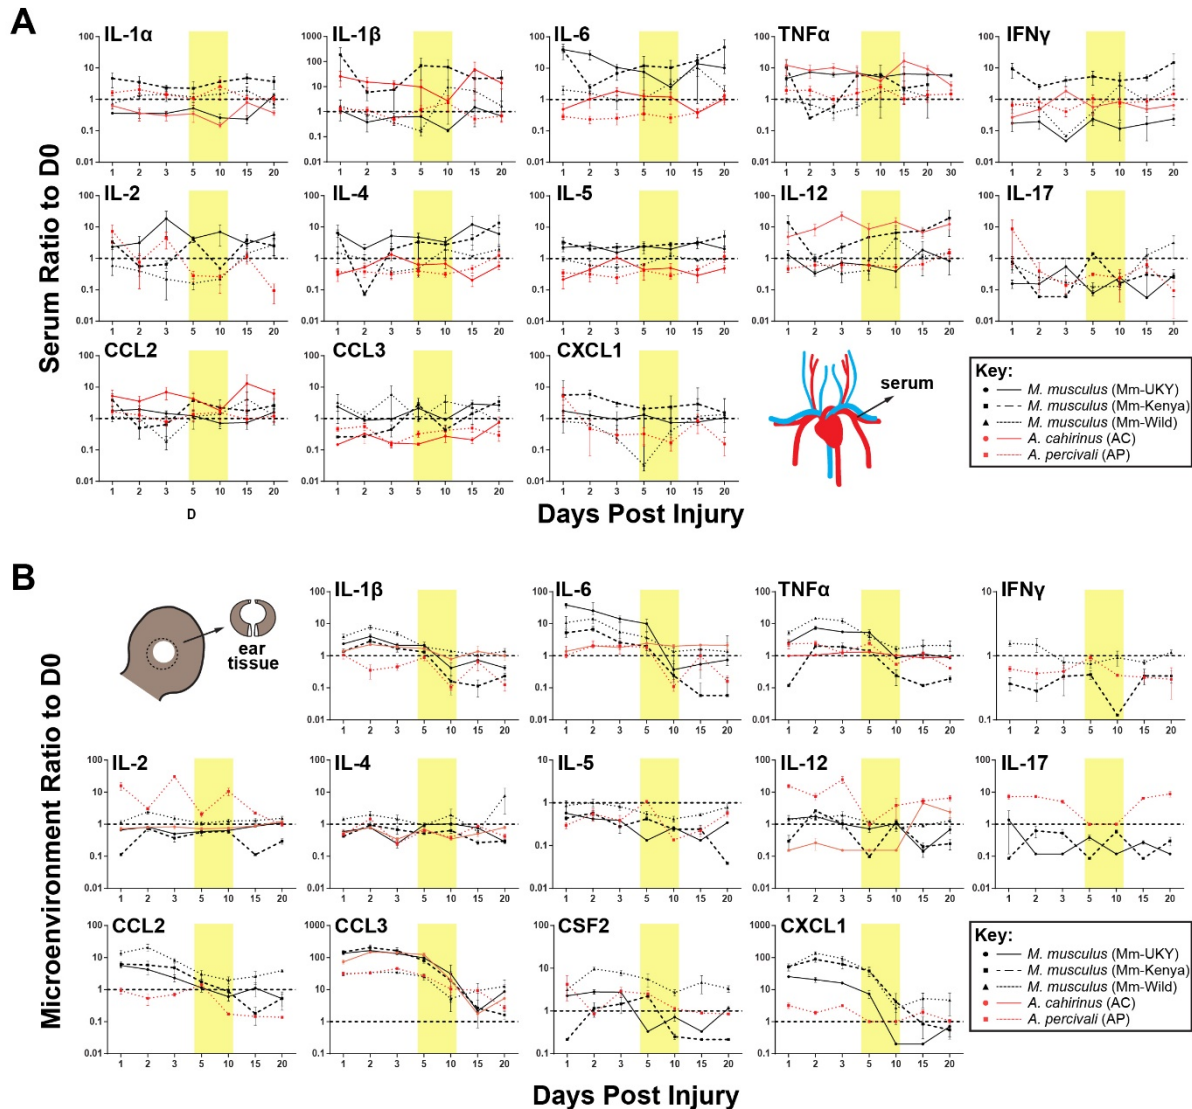

## SUPPLEMENTAL TABLES

**Table S1:** Summary of animals used in this study.

|                                             | <i>M. musculus</i>       | <i>M. musculus</i> | <i>M. musculus</i>       | <i>A. cahirinus</i>      | <i>A. percivali</i>      |
|---------------------------------------------|--------------------------|--------------------|--------------------------|--------------------------|--------------------------|
| Abbreviation:                               | Mm-UKY                   | Mm-Kenya           | Mm-Wild                  | Ac                       | Ap                       |
| Strain:                                     | ND4                      | “Swiss”            | Wild-caught              | UKY Colony               | Wild-caught              |
| Location:                                   | Kentucky                 | Kenya              | Kentucky                 | Kentucky                 | Kenya                    |
| Life history:                               | Lab-reared               | Local breeder      | Wild                     | Lab-reared               | Wild                     |
| Regenerates?                                | No                       | No                 | No                       | Yes                      | Yes                      |
| Immune status:                              | Naïve                    | Primed             | Primed                   | Naïve                    | Primed                   |
| Animal numbers by experiment in this study: |                          |                    |                          |                          |                          |
| <b>Parallelism</b>                          | 3 (Female)               | n/a                | n/a                      | 3 (Female)               | 3 (Female)               |
| (In addition to pooled samples)             | 3 (Male)                 |                    |                          | 3 (Male)                 | 3 (Male)                 |
| <b>Cytokine analysis time course</b>        |                          |                    |                          |                          |                          |
| Per timepoint:                              | 3 to 5 (F)<br>3 to 5 (M) | 5 to 9 (F)         | 1 to 3 (F)<br>2 to 4 (M) | 3 to 5 (F)<br>3 to 5 (M) | 5 to 7 (F)<br>3 to 5 (M) |
| Totals:                                     | 28 (F)<br>30 (M)         | 59 (F)             | 16 (F)<br>23 (M)         | 30 (F)<br>30 (M)         | 41 (F)<br>28 (M)         |
| <b>T cell analysis</b>                      |                          |                    |                          |                          |                          |
| Flow:                                       | 22 (F)                   | n/a                | n/a                      | 21 (F)                   | n/a                      |
| Histo. / Western:                           | 28 (F)                   | n/a                | n/a                      | 28 (F)                   | n/a                      |
| <b>COX-2 inhibition</b>                     |                          |                    |                          |                          |                          |
| D10 Histology:                              | 10 (F)                   | n/a                | n/a                      | n/a                      | n/a                      |
| Time course:                                | 20 (F)                   | n/a                | n/a                      | n/a                      | n/a                      |

**Table S2:** One-way ANOVA analyses of log-transformed uninjured serum data. Groups listed in comparison column represent groups for which data was quantified and could be compared. *P*-values indicate where at least one group is significantly different from another group. Tukey-Kramer HSD post-hoc tests were used for pairwise comparisons are summarized in Figure 1A (See Data File S1).

| Antigen       | Comparison                    | N   | F     | <i>P</i> -value |
|---------------|-------------------------------|-----|-------|-----------------|
| IL-1 $\alpha$ | All groups                    | 5   | 2.69  | 0.051           |
| IL-1 $\beta$  | All groups                    | 5   | 11.15 | <0.001*         |
| IL-2          | All groups                    | 5   | 10.27 | <0.001*         |
| IL-4          | All groups                    | 5   | 6.00  | 0.001*          |
| IL-5          | All groups                    | 5   | 2.63  | 0.055           |
| IL-6          | All groups                    | 5   | 6.31  | 0.001*          |
| IL-12         | All groups                    | 5   | 5.21  | 0.003*          |
| IL-17         | Mm-UKY, Mm-Kenya, Mm-Wild, Ap | 4   | 1.15  | 0.349           |
| CSF2          | None – all undetectable       | n/a | n/a   | n/a             |
| CCL2          | All groups                    | 5   | 16.03 | <0.001*         |
| CCL3          | All groups                    | 5   | 2.59  | 0.058           |
| IFN $\gamma$  | All groups                    | 5   | 3.25  | 0.026*          |
| TNF $\alpha$  | All groups                    | 5   | 23.80 | <0.001*         |
| CXCL1         | All groups                    | 5   | 4.07  | 0.010*          |

**Table S3:** Two-way ANOVA analyses of log-transformed serum time series data. Groups listed in comparison column represent groups for which data was quantified throughout the time series. Tukey-Kramer HSD post-hoc tests were used for pairwise comparisons and the results are summarized in Figure 1B (See Data File S1).

|               |                               |     | Group |         | Day  |         | Group*Day |         |
|---------------|-------------------------------|-----|-------|---------|------|---------|-----------|---------|
| Antigen       | Comparison                    | N   | F     | P-value | F    | P-value | F         | P-value |
| IL-1 $\alpha$ | All groups                    | 255 | 32.51 | <0.001* | 0.93 | 0.471   | 1.62      | 0.039*  |
| IL-1 $\beta$  | Mm-UKY, Mm-Wild, Ap           | 157 | 3.02  | 0.052   | 1.06 | 0.391   | 1.08      | 0.386   |
| IL-2          | All groups                    | 255 | 27.82 | <0.001* | 2.46 | 0.025*  | 1.96      | 0.006*  |
| IL-4          | All groups                    | 255 | 34.54 | <0.001* | 1.47 | 0.188   | 1.55      | 0.053   |
| IL-5          | All groups                    | 255 | 63.22 | <0.001* | 0.94 | 0.469   | 0.82      | 0.706   |
| IL-6          | All groups                    | 255 | 64.61 | <0.001* | 2.29 | 0.037*  | 2.63      | <0.001* |
| IL-12         | All groups                    | 255 | 33.25 | <0.001* | 2.21 | 0.660   | 0.91      | 0.583   |
| IL-17         | Mm-UKY, Mm-Kenya, Mm-Wild, Ap | 205 | 7.64  | <0.001* | 2.78 | 0.013*  | 2.60      | <0.001* |
| CSF2          | None – all undetectable       | 0   | n/a   | n/a     | n/a  | n/a     | n/a       | n/a     |
| CCL2          | All groups                    | 255 | 5.72  | <0.001* | 1.46 | 0.193   | 1.16      | 0.278   |
| CCL3          | All groups                    | 255 | 38.75 | <0.001* | 0.91 | 0.486   | 1.47      | 0.079   |
| IFN $\gamma$  | All groups                    | 255 | 37.81 | <0.001* | 1.22 | 0.296   | 1.77      | 0.018*  |
| TNF $\alpha$  | All groups                    | 255 | 31.88 | <0.001* | 0.85 | 0.535   | 0.91      | 0.583   |
| CXCL1         | Mm-UKY, Mm-Kenya, Mm-Wild, Ap | 205 | 69.43 | <0.001* | 4.33 | <0.001* | 1.47      | 0.104   |

**Table S4:** Two-way ANOVA analyses of log-transformed tissue lysate time series data. Groups listed in comparison column represent groups for which data was quantified throughout the time series. *P*-values indicate where at least one group is significantly different from another group. Tukey-Kramer HSD post-hoc tests were used for pairwise comparisons and the results are summarized in Figure 2 (See Data File S1).

| Antigen       | Comparison                          | N   | Group  |                 | Day    |                 | Group*Day |                 |
|---------------|-------------------------------------|-----|--------|-----------------|--------|-----------------|-----------|-----------------|
|               |                                     |     | F      | <i>P</i> -value | F      | <i>P</i> -value | F         | <i>P</i> -value |
| IL-1 $\alpha$ | None – all above limit of detection | 0   | n/a    | n/a             | n/a    | n/a             | n/a       | n/a             |
| IL-1 $\beta$  | All groups                          | 261 | 77.88  | <0.001*         | 39.47  | <0.001*         | 5.33      | <0.001*         |
| IL-2          | All groups                          | 261 | 190.93 | <0.001*         | 6.68   | <0.001*         | 13.59     | <0.001*         |
| IL-4          | All groups                          | 261 | 29.09  | <0.001*         | 11.24  | <0.001*         | 6.76      | <0.001*         |
| IL-5          | Mm-UKY, Mm-Kenya, Mm-Wild, Ap       | 211 | 22.73  | <0.001*         | 10.03  | <0.001*         | 10.70     | <0.001*         |
| IL-6          | All groups                          | 261 | 76.89  | <0.001*         | 104.11 | <0.001*         | 15.06     | <0.001*         |
| IL-12         | All groups                          | 261 | 123.20 | <0.001*         | 10.42  | <0.001*         | 18.28     | <0.001*         |
| IL-17         | Mm-UKY, Mm-Kenya, Ap                | 177 | 598.63 | <0.001*         | 4.42   | <0.001*         | 17.55     | <0.001*         |
| CSF2          | Mm-UKY, Mm-Kenya, Mm-Wild, Ap       | 211 | 104.44 | <0.001*         | 21.36  | <0.001*         | 8.51      | <0.001*         |
| CCL2          | Mm-UKY, Mm-Kenya, Mm-Wild, Ap       | 211 | 72.96  | <0.001*         | 38.71  | <0.001*         | 5.23      | <0.001*         |
| CCL3          | All groups                          | 261 | 8.30   | <0.001*         | 160.11 | <0.001*         | 6.24      | <0.001*         |
| IFN $\gamma$  | Mm-Kenya, Mm-Wild, Ap               | 161 | 40.47  | <0.001*         | 2.42   | 0.030*          | 3.00      | <0.001*         |
| TNF $\alpha$  | All groups                          | 261 | 149.87 | <0.001*         | 81.32  | <0.001*         | 11.84     | <0.001*         |
| CXCL1         | Mm-UKY, Mm-Kenya, Mm-Wild, Ap       | 211 | 137.76 | <0.001*         | 201.75 | <0.001*         | 26.64     | <0.001*         |

**Table S5:** One-way ANOVA analysis of tissue cytokine data to test for an effect of group at D1, 2, 10 and 20. *P*-values indicate where at least one group is significantly different from another group. Tukey-Kramer HSD post-hoc tests were used for pairwise comparisons and are summarized in Figure 3 (See Data File S1).

| Antigen      | Comparison                    | N | Day | F-Ratio | <i>P</i> -value |
|--------------|-------------------------------|---|-----|---------|-----------------|
| IL-1 $\beta$ | All groups                    |   | 1   | 5.39    | 0.002*          |
|              |                               |   | 2   | 32.52   | <0.001*         |
|              |                               |   | 10  | 20.70   | <0.001*         |
|              |                               |   | 20  | 19.05   | <0.001*         |
| IL-4         | All groups                    |   | 1   | 9.71    | <0.001*         |
|              |                               |   | 2   | 4.8     | 0.004*          |
|              |                               |   | 10  | 5.23    | 0.003*          |
|              |                               |   | 20  | 18.89   | <0.001*         |
| IL-6         | All groups                    |   | 1   | 14.56   | <0.001*         |
|              |                               |   | 2   | 47.24   | <0.001*         |
|              |                               |   | 10  | 23.30   | <0.001*         |
|              |                               |   | 20  | 21.50   | <0.001*         |
| IL-12        | All groups                    |   | 1   | 57.33   | <0.001*         |
|              |                               |   | 2   | 14.22   | <0.001*         |
|              |                               |   | 10  | 7.66    | <0.001*         |
|              |                               |   | 20  | 26.33   | <0.001*         |
| IL-17        | Mm-UKY, Mm-Kenya and Ap       |   | 1   | 45.87   | <0.001*         |
|              |                               |   | 2   | 93.60   | <0.001*         |
|              |                               |   | 10  | 441.78  | <0.001*         |
|              |                               |   | 20  | 116.93  | <0.001*         |
| CCL2         | Mm-UKY, Mm-Kenya, Mm-Wild, Ap |   | 1   | 21.55   | <0.001*         |
|              |                               |   | 2   | 33.43   | <0.001*         |
|              |                               |   | 10  | 7.04    | 0.002*          |
|              |                               |   | 20  | 11.68   | <0.001*         |
| TNF $\alpha$ | All groups                    |   | 1   | 39.61   | <0.001*         |
|              |                               |   | 2   | 54.97   | <0.001*         |
|              |                               |   | 10  | 27.95   | <0.001*         |
|              |                               |   | 20  | 67.67   | <0.001*         |
| CXCL1        | All groups                    |   | 1   | 60.99   | <0.001*         |
|              |                               |   | 2   | 210.02  | <0.001*         |
|              |                               |   | 10  | 15.23   | <0.001*         |
|              |                               |   | 20  | 9.54    | <0.001*         |



**Table S6:** List of T cell phenotyping antibodies tried using flow cytometry in *Acomys cahirinus*.

| Antigen | Clone    | Supplier         | Catalog# | Status                |
|---------|----------|------------------|----------|-----------------------|
| CD45    | OX-1     | BioLegend        | 202207   | No – no separation    |
|         | 30-F11   | BioLegend        | 103106   | No – no separation    |
|         | I3/2.3   | Molecular Probes | A15395   | No – no separation    |
| CD3     | 17A2     | BioLegend        | 100236   | Yes – good population |
| TCRab   | H57-597  | BioLegend        | 109207   | No – poor separation  |
|         | R73      | BioLegend        | 201107   | No – no separation    |
| TCRgd   | GL3      | BioLegend        | 118107   | No – poor separation  |
|         | VC7-13D5 | BioLegend        | 107507   | No – poor separation  |
| CD4     | GK1.5    | BioLegend        | 100433   | No – no separation    |
|         | RM4-4    | BioLegend        | 116011   | No – poor separation  |
| CD8     | 53-6.7   | BioLegend        | 100726   | No – no separation    |
| CD25    | P61      | BioLegend        | 102015   | No – poor separation  |
|         | 3C7      | BioLegend        | 101915   | No – no separation    |
| CD69    | H1.2F3   | BioLegend        | 104511   | No – poor separation  |
| CD196   | 29-2L17  | BioLegend        | 129813   | No – poor separation  |
|         | 140706   | BD Pharmingen    | 561753   | Yes – good population |
| CD206   | C068C2   | BioLegend        | 141705   | Yes – good population |
| CD49b   | HMa2     | BioLegend        | 103515   | Yes – good population |
|         | DX5      | BioLegend        | 108909   | No – poor separation  |

## Supplemental Files

Data File S1 contains summary tables of post-hoc multiple comparison tests used in Figure 2, Figure 3 and Figure S2.

Data File S2. Comparisons of amino acid sequence alignments for antigens in study. Predicted amino acid sequence was translated from mRNA (*A. cahirinus*) or obtained from NCBI (*H. sapiens*, *M. musculus*, *R. rattus*) and aligned together using MAFFT. Figures were created using BOXSHADE where solid black shading is equivalent, gray shading is similar and no shading is dissimilar.
